# Supplementary material
Source: PubMed Central journal article supplement (PMC4236539)

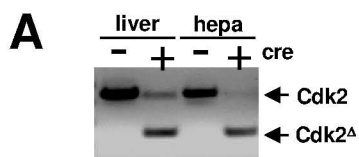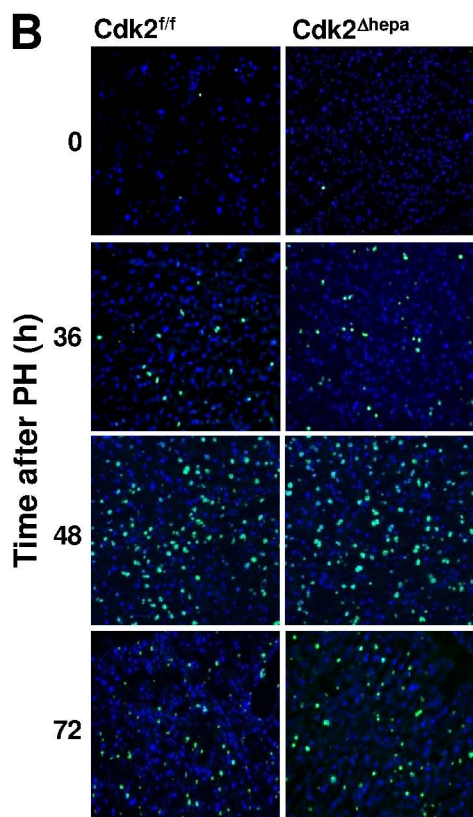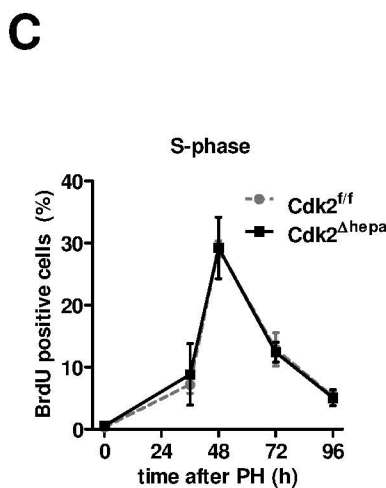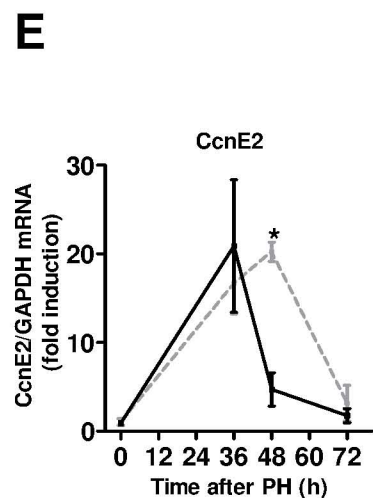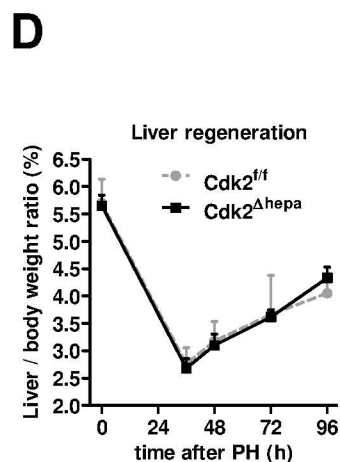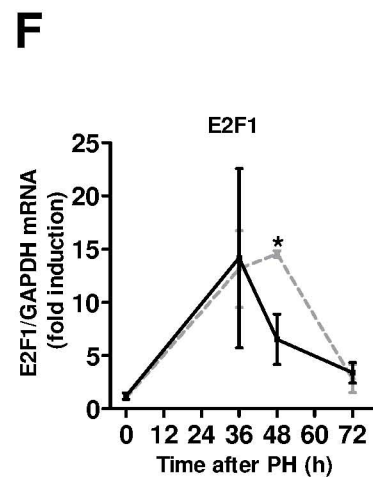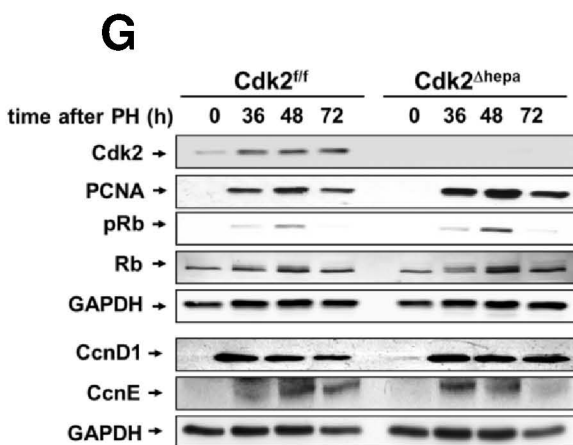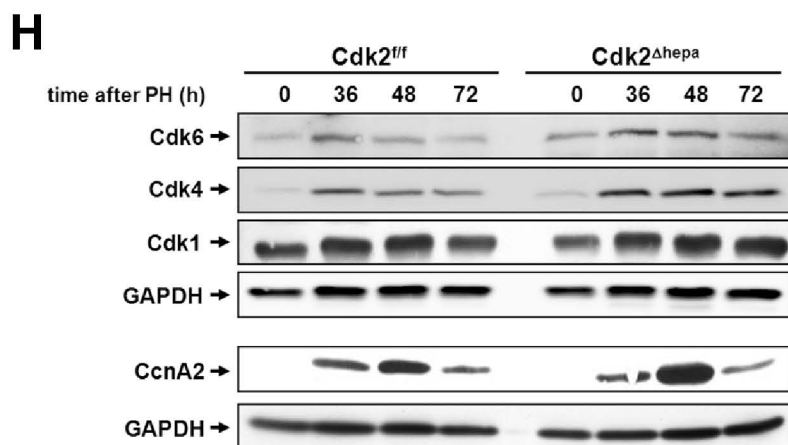

**A**

CHIP sense primer →  
 agattcccgtcgggccttcgctcgcggcgaccggcgcttctggtgacgtcacgg  
  
 E2F binding site / EMSA oligo  
 actccggacgcctcattggtttat **TTCAATAGTCGCGGGATACTT** gaactac  
  
 ← CHIP antisense primer  
 aagaccagcagccggcgggcgggcgcgcagctcgcggctcctcctgggctctacgctcct

**B****CHIP**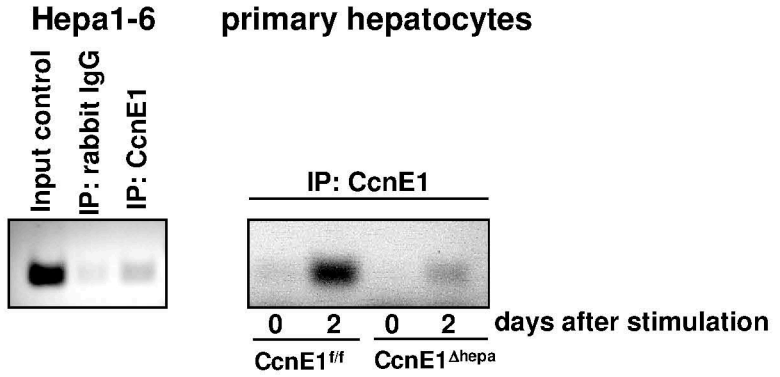**C****EMSA**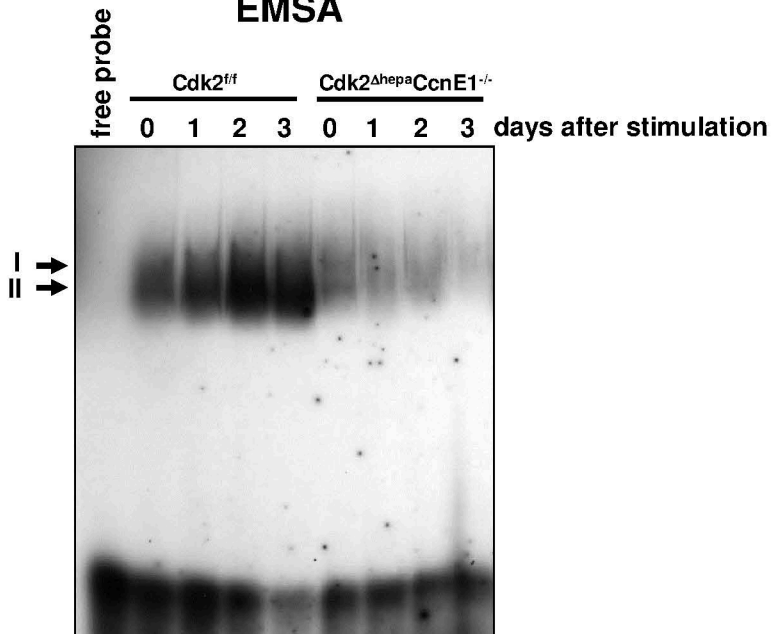

**A**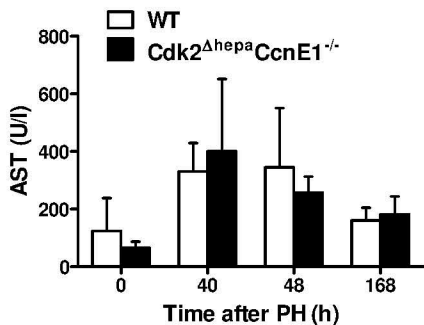**B**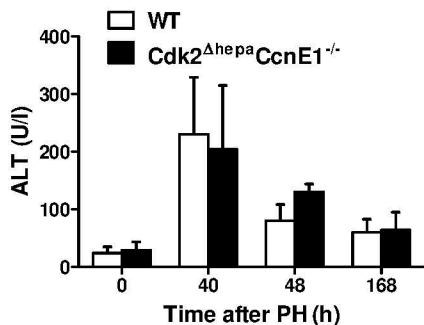**C**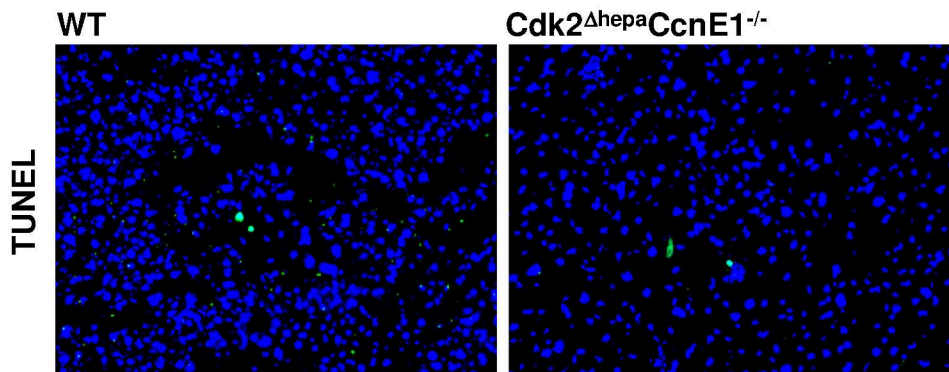**D**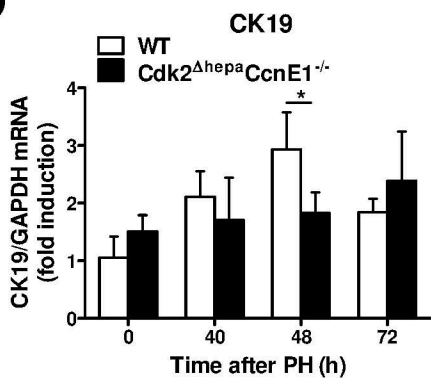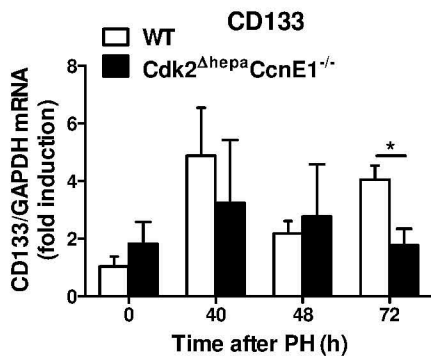

**A**

WT

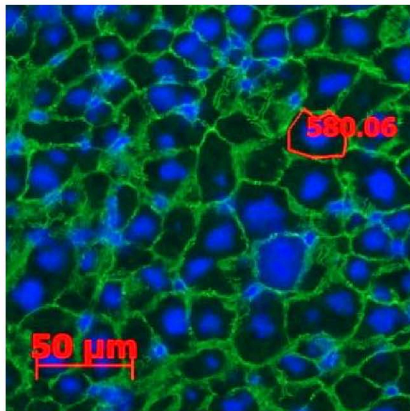 $\text{Cdk2}^{\Delta\text{hepa}}\text{CcnE1}^{-/-}$ 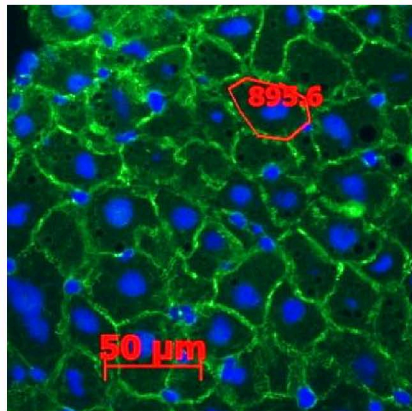**B**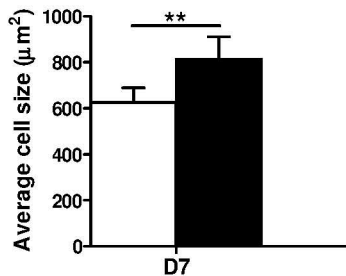

□ WT  
■  $\text{Cdk2}^{\Delta\text{hepa}}\text{CcnE1}^{-/-}$

**C**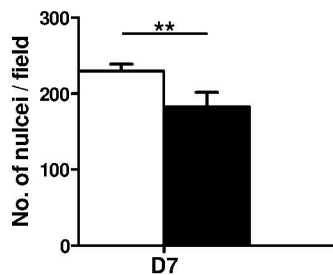

□ WT  
■  $\text{Cdk2}^{\Delta\text{hepa}}\text{CcnE1}^{-/-}$

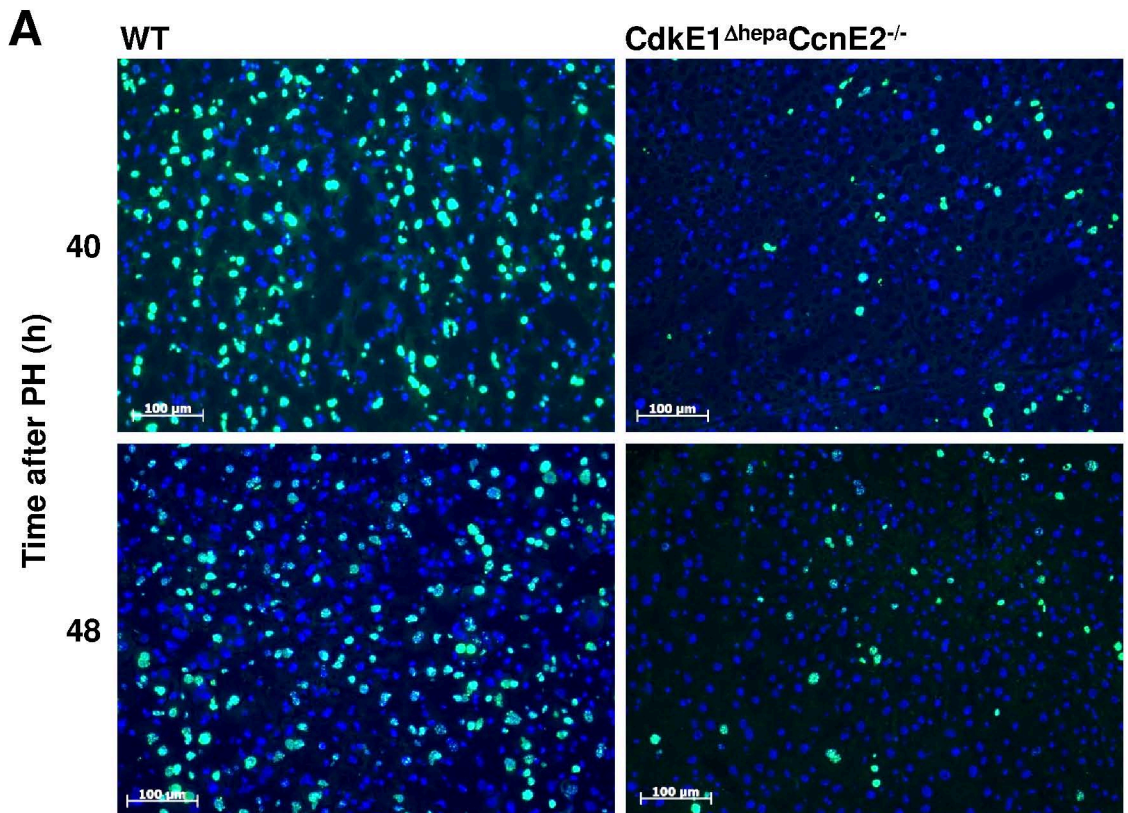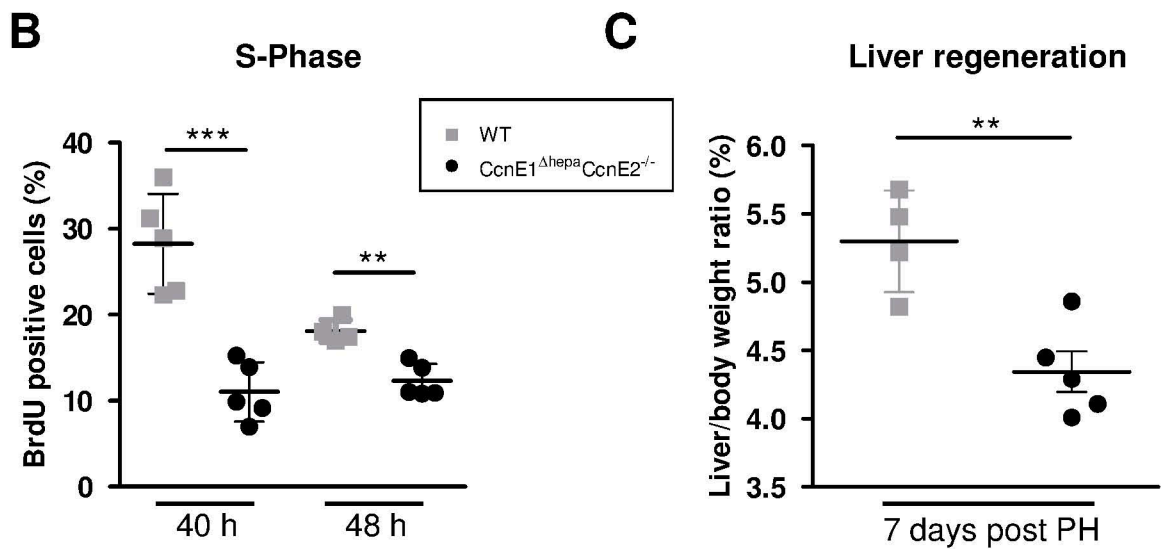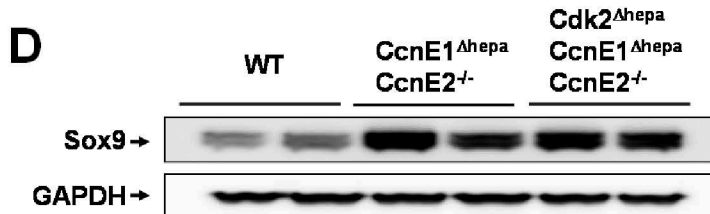

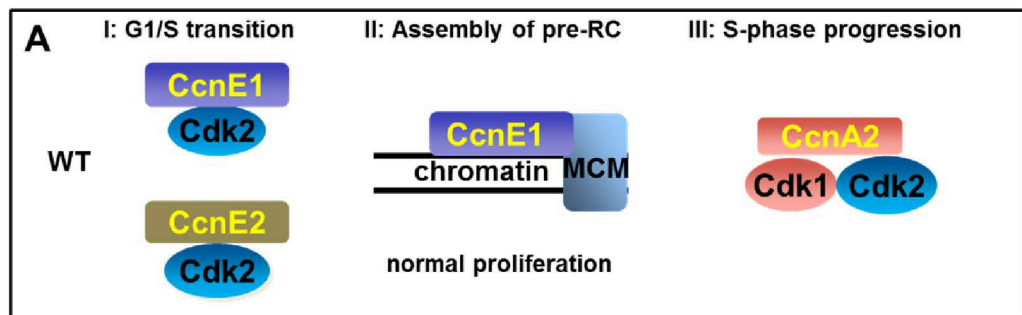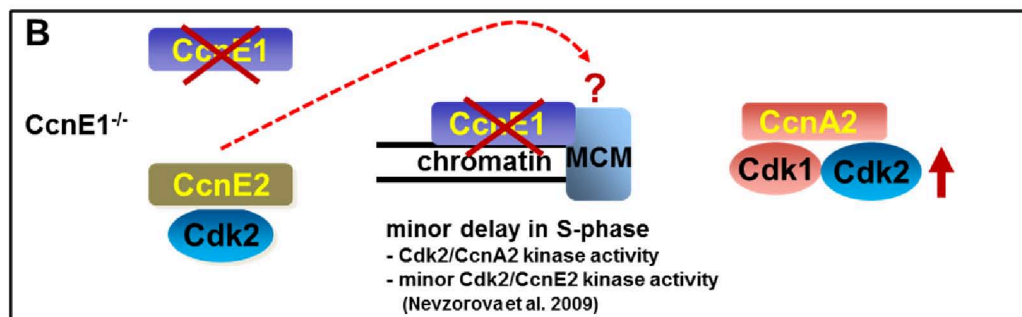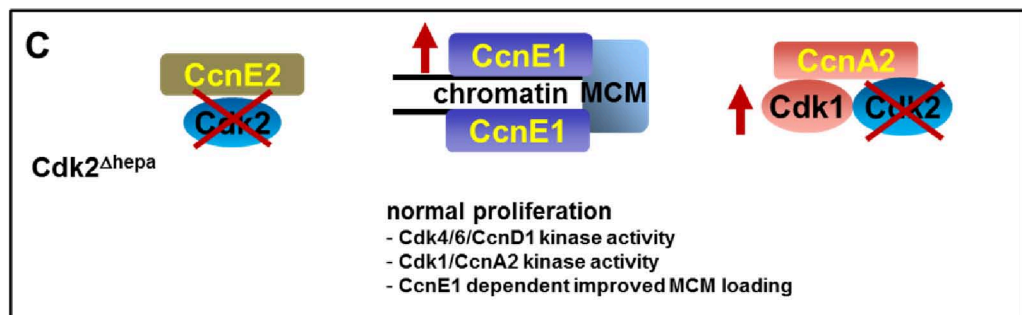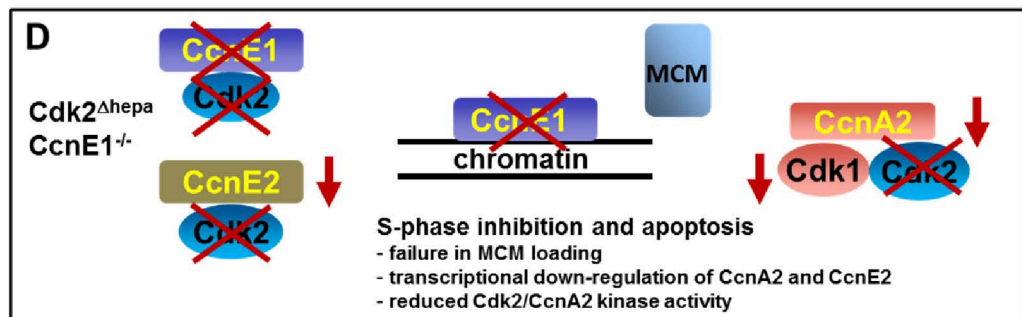

Supplement: NIHMS641783-supplement-Supp_FigureS1-S6.pdf [file NIHMS641783-supplement-Supp_FigureS1-S6.pdf]
